# Supplementary material
Source: Springer Nature journal article supplement (https://www.springermedizin.de/resource/supplementary/13256_2008_446_MOESM3_ESM.pdf/9646002)

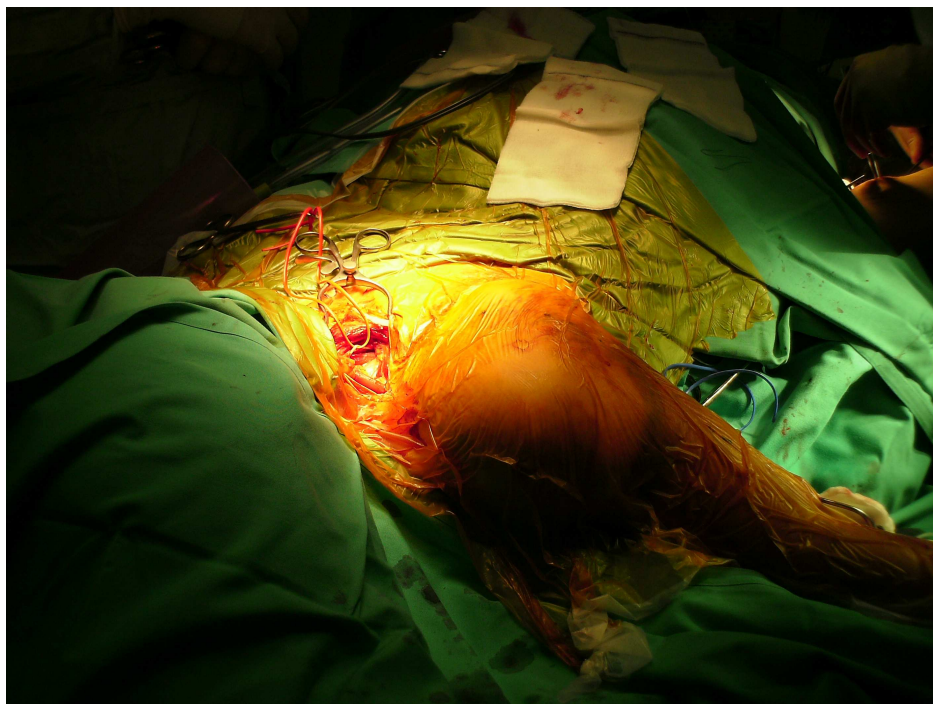

(A)

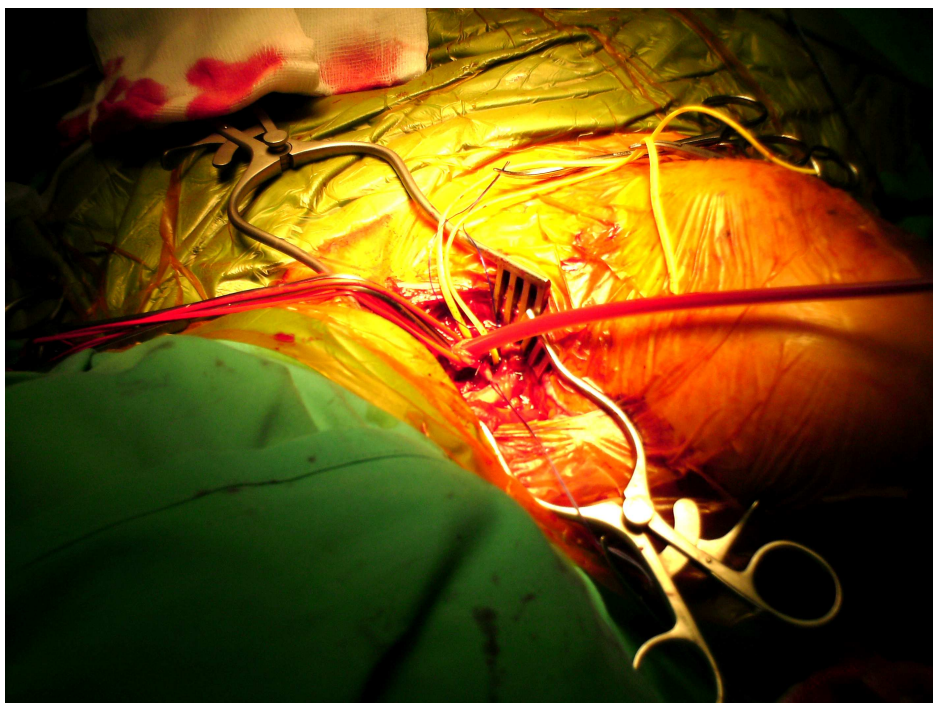

(B)

Supplement: MOESM3 [file 9646002]
